# Supplementary material
Source: PubMed Central journal article supplement (PMC6645546)
Supplement: ao7b01436_si_001.pdf [file ao7b01436_si_001.pdf]

# Silver decorated boron nitride nanosheets as an effective hybrid filler in PMMA for high thermal conductivity electronic substrates

Abhilash Pullanchiyodan<sup>1,2</sup>, Kanakangi S. Nair<sup>1,2</sup>, and Kuzhichalil P. Surendran<sup>1,2\*</sup>

<sup>1</sup>Materials Science and Technology Division,  
National Institute for Interdisciplinary Science and Technology (NIIST- CSIR)  
Thiruvananthapuram, India – 695019

<sup>2</sup>Academy of Science and Innovative Research (AcSIR), India

## Supplementary Information

**Table S1: Volume fraction of components used in nanocomposites**

| Material  | Vol fraction of hybrid filler (BNNS/AgNP)* | Vol fraction of BNNS | Vol fraction of AgNP |
|-----------|--------------------------------------------|----------------------|----------------------|
| PMMA      | 0                                          | 0                    | 0                    |
| PMMA-BA5  | 0.05                                       | 0.08                 | 0.02                 |
| PMMA-BA15 | 0.15                                       | 0.23                 | 0.06                 |
| PMMA-BA25 | 0.25                                       | 0.36                 | 0.1                  |
| PMMA-BA35 | 0.35                                       | 0.47                 | 0.15                 |

\* For all composites, the mass ratio of hBN and AgNO<sub>3</sub> is kept constant as 1:1

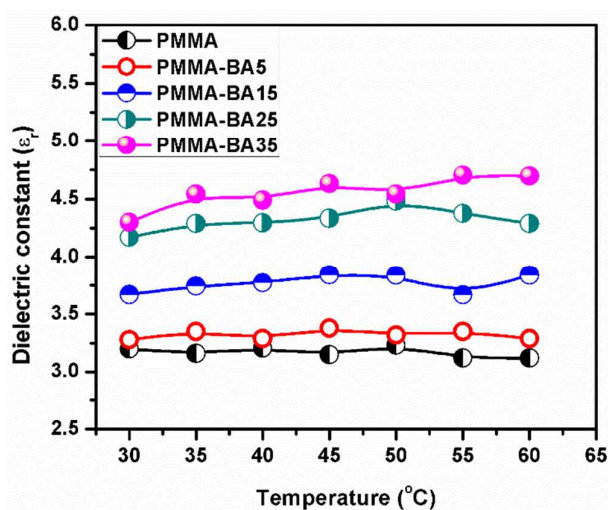

**Figure S1: Variation of dielectric constant with temperature**

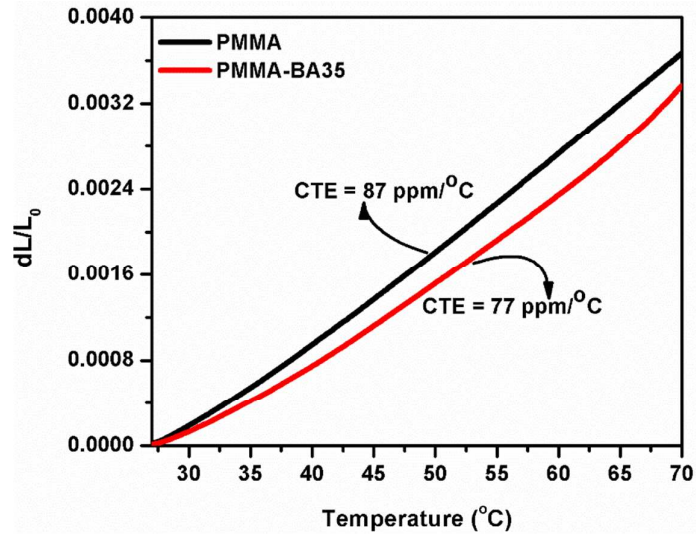

Figure S2: Thermal expansion behaviour of PMMA and PMMA-BA35
